# Supplementary material
Source: Springer Nature journal article supplement (https://www.springermedizin.de/resource/supplementary/13643_2014_268_MOESM6_ESM.pdf/9681934)
Supplement: MOESM6 [file 9681934]

We will classify SSBs described in studies according to the following broad categories:

- Sodas – caffeinated/non-caffeinated (soft drinks, soda, pop, soda pop)
- Other non-carbonated sweetened beverages (fruitades, fruit drinks, fruit punches, [iced] teas, coffees, non-dairy fruit smoothies) – caffeinated/non-caffeinated
- Fortified sweetened beverages (energy drinks, fortified waters, sports drinks) – caffeinated/non-caffeinated and containing vitamins, amino acids, herbal stimulants, or other ingredients
- Flavored/Sweetened milk or milk alternative beverages (dairy, soy, almond, milkshakes, dairy based fruit smoothies) – caffeinated/non-caffeinated
